# Supplementary material for: The key role of geminate electron–hole pair recombination in the delayed fluorescence in rhodamine 6G and ATTO-532
Source: Royal Society of Chemistry journal article supplement (doi:10.1039/c4cp01675k), 2014-01-01
Supplement: c4cp01675k1.pdf [file c4cp01675k1.pdf]

**SUPPLEMENTARY of PAPER**

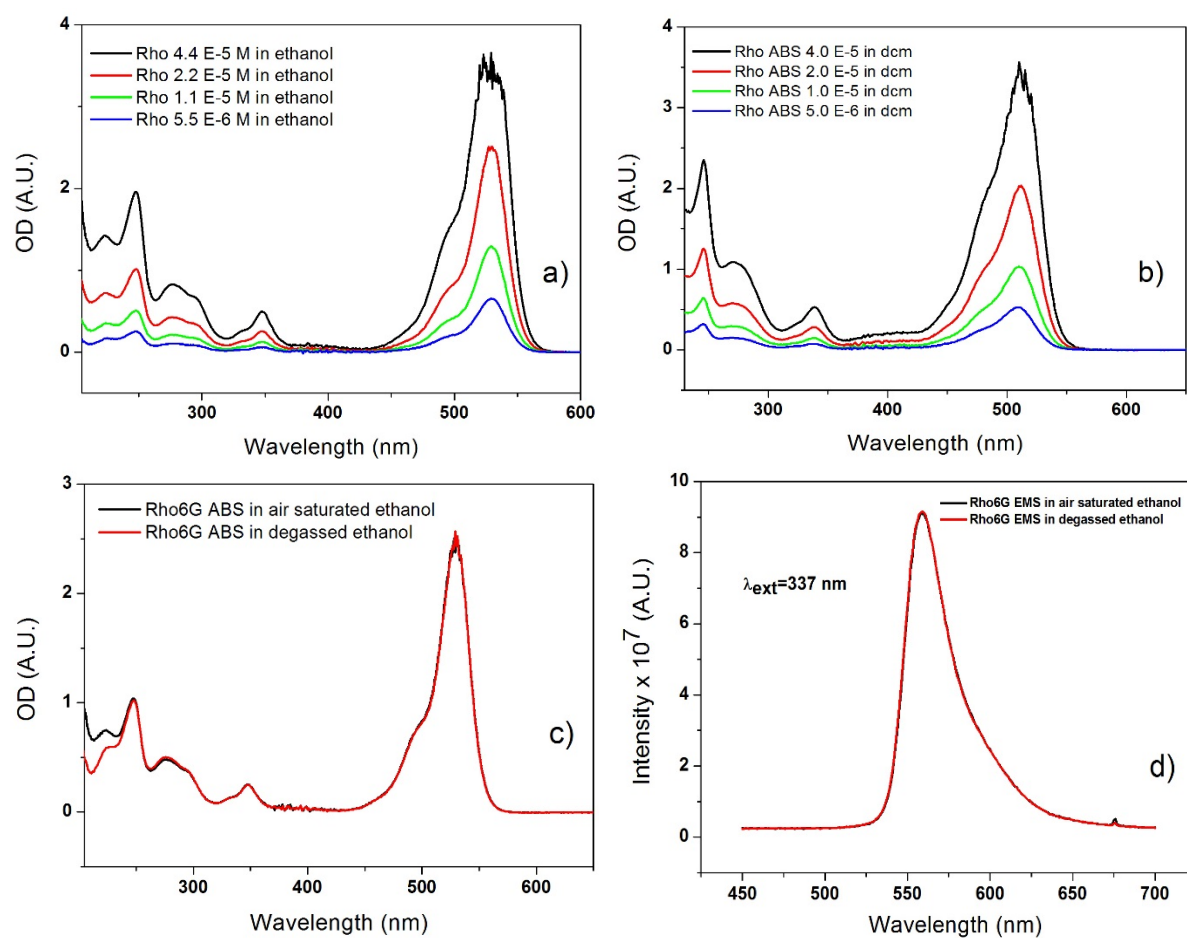

**Figure 1** Rhodamine 6G a) the concentration dependence of absorption in air saturated Ethanol solution b) the concentration dependence of absorption in air saturated DCM solution c) absorption in air saturated and degassed environment d) Photoluminescence spectra, excitation with the same wavelengths (Ex. 337 nm) in air saturated and degassed environment

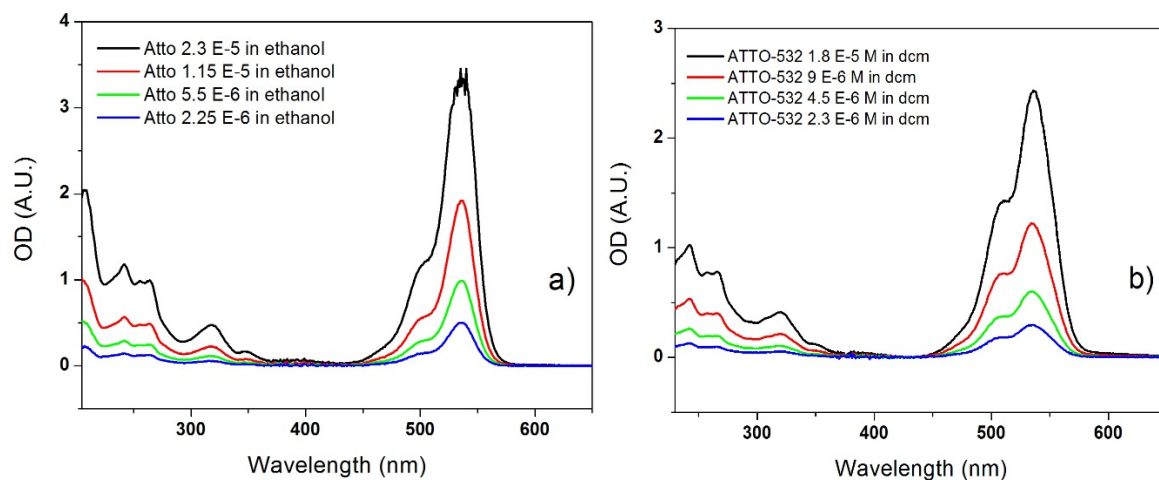

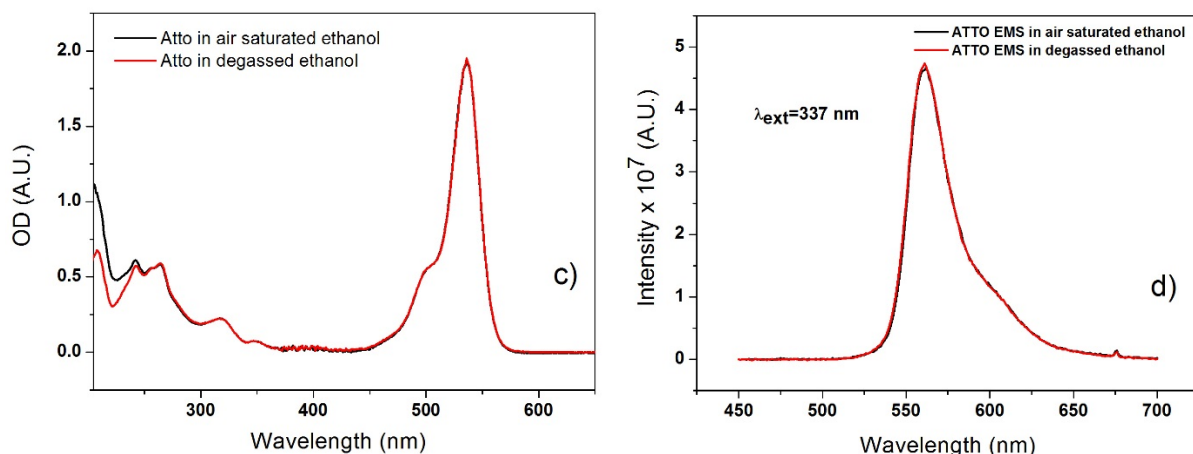

**Figure 2** ATTO-532 a) the concentration dependence of absorption in air saturated Ethanol solution b) the concentration dependence of absorption in air saturated DCM solution c) absorption in air saturated and degassed environment d) Photoluminescence spectra, excitation with the same wavelengths (Ex. 337 nm ) in air saturated and degassed environment

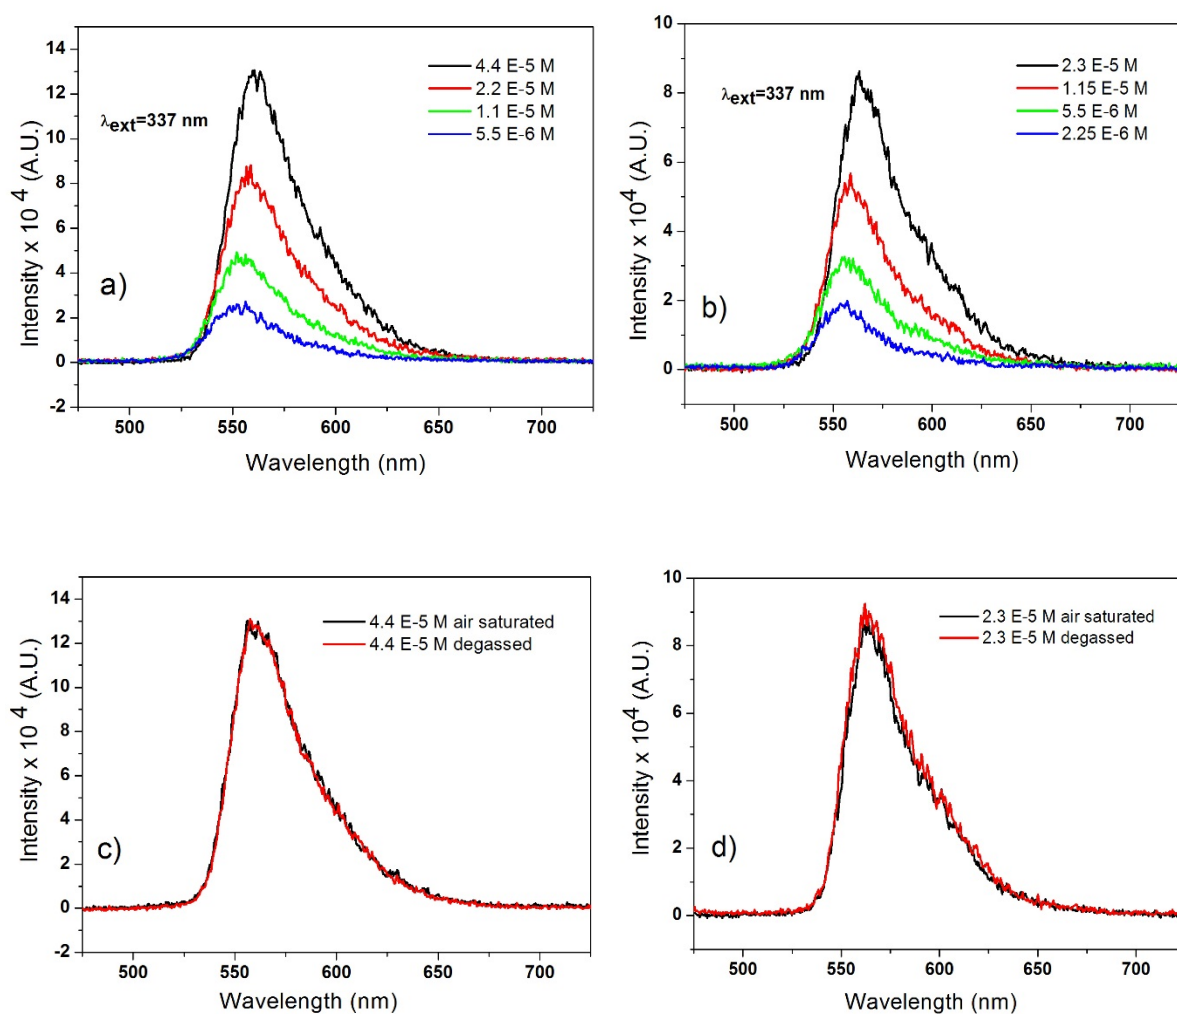

**Figure 3** At each measurements the delay time was chosen as 130 ns and the integration time was 1  $\mu$ s a) The delay fluorescence of Rhodamine 6G in variety of concentrations in saturated ethanol solution b) The delay fluorescence of ATTO-532 in variety of concentrations in air saturated ethanol solution c) The DF of Rhodamine 6G in air saturated and degassed environment d) The DF of ATTO-532 in air saturated and degassed environment
